1 **Genetic structure of the stingless bee *Tetragonisca angustula***

2 Flávio O. Francisco<sup>1,2</sup>, Leandro R. Santiago<sup>1</sup>, Yuri M. Mizusawa<sup>1</sup>, Benjamin P. Oldroyd<sup>2</sup> and  
3 Maria C. Arias<sup>1</sup>

4

5 <sup>1</sup>*Departamento de Genética e Biologia Evolutiva, Instituto de Biociências, Universidade de*  
6 *São Paulo, Rua do Matão 277 – sala 320, São Paulo, SP 05508-090, Brazil*

7 <sup>2</sup>*Behaviour and Genetics of Social Insects Lab, School of Biological Sciences A12, University*  
8 *of Sydney, Sydney, NSW 2006, Australia*

9

10

11 Correspondence:

12 Flávio O. Francisco, Departamento de Genética e Biologia Evolutiva, Instituto de Biociências,  
13 Universidade de São Paulo, Rua do Matão 277 – sala 320, 05508-090, São Paulo, SP, Brazil.  
14 Tel: +55 11 30917587; Fax: +55 11 30917553; email: fofrancisco@usp.br

15

16 Running title: Genetic structure of *T. angustula*

17

18 **Abstract**

19 The stingless bee *Tetragonisca angustula* Latreille 1811 is distributed from Mexico to  
20 Argentina and is one of the most widespread bee species in the Neotropics. However, this  
21 wide distribution contrasts with the short distance traveled by females to build new nests.  
22 Here we evaluate the genetic structure of several populations of *T. angustula* using  
23 mitochondrial DNA and microsatellites. These markers can help us to detect differences in the  
24 migratory behavior of males and females. Our results show that the populations are highly  
25 differentiated suggesting that both females and males have low dispersal distance. Therefore,  
26 its continental distribution probably consists of several cryptic species.

27

28 **Key words** islands; Meliponini; microsatellites; mtDNA; population genetics

## 29 **Introduction**

30 The stingless bee *Tetragonisca angustula* Latreille 1811 distributed from Mexico to Argentina  
31 is one of the most widespread bee species in the Neotropics (Silveira *et al.*, 2002; Camargo &  
32 Pedro, 2013). It is a small (4-5 mm in length), generalist and highly eusocial bee (Michener,  
33 2007) and highly adaptable to different nest sites. Colonies comprise up to 5,000 individuals  
34 (Lindauer & Kerr, 1960), and are usually built in tree trunks or in wall cavities. It swarms  
35 frequently and is extremely successful in urban environments (Batista *et al.*, 2003; Slaa, 2006;  
36 Velez-Ruiz *et al.*, 2013). *Tetragonisca angustula* is one of the most popular stingless bees for  
37 meliponiculture in Latin America (Nogueira-Neto, 1997; Cortopassi-Laurino *et al.*, 2006) and  
38 nest transportation and trading is very common among beekeepers.

39 In general, colony reproduction in stingless bees begins by workers searching for a  
40 new nest site within their foraging range (van Veen & Sommeijer, 2000a). Daughter nests are  
41 established at most a few hundred meters from the “mother” nest (Nogueira-Neto, 1997).  
42 After selecting the site, several workers begin to transport cerumen, propolis and honey from  
43 the mother nest to the new one (Nogueira-Neto, 1997). This nest site preparation phase can  
44 last from a few days (van Veen & Sommeijer, 2000a) to a few months (Nogueira-Neto, 1997).  
45 A virgin queen then leaves the mother nest accompanied by hundreds of workers (van Veen &  
46 Sommeijer, 2000b). The next day the virgin queen flies out, mates with presumably one male  
47 (Peters *et al.*, 1999; Palmer *et al.*, 2002), returns to the nest and about a week later begins  
48 oviposition (van Veen & Sommeijer, 2000b).

49 In contrast, little is known about the reproductive behavior of stingless bee males.  
50 After emergence from brood cells, they remain in the nest for two to three weeks (Cortopassi-  
51 Laurino, 2007). They then leave the nest and never return. There are no data about the  
52 behavior of males during their period outside the nest. In the laboratory, males can live up to  
53 six weeks (Velthuis *et al.*, 2005). Therefore, they likely have two to four weeks for dispersal

54 and reproduction. Males often form mating aggregations, and these are comprised of males  
55 from hundreds of different, and not necessarily nearby colonies (Paxton, 2000; Cameron *et*  
56 *al.*, 2004; Kraus *et al.*, 2008; Mueller *et al.*, 2012). This suggests high male dispersal.

57 Studies on the genetic structure of populations can help us better understand dispersal  
58 behavior and evolutionary history. There are three existing population genetic studies of *T.*  
59 *angustula* (Oliveira *et al.*, 2004; Baitala *et al.*, 2006; Stuchi *et al.*, 2008). These studies are of  
60 limited scope due to limited sampling or the use of outdated molecular markers such as  
61 RAPDs and isozymes. Thus, the conclusions are ambiguous concerning the extent and  
62 direction of gene flow, population differentiation, dispersal and evolutionary history.

63 Here we evaluate the genetic structure of several populations of *T. angustula* using  
64 mitochondrial DNA (mtDNA) and microsatellite markers. Considering the wide distribution  
65 of *T. angustula* and the commonness of nest transportation and trading, we expect low genetic  
66 differentiation among populations despite the low dispersal distance of females during  
67 swarming.

68

69

## 70 **Materials and methods**

### 71 *Sampling*

72 We collected 1,002 *T. angustula* from 457 sites distributed on the mainland and islands in  
73 south/south-eastern Brazil (Table S1). Eleven islands all with arboreal vegetation and of area  
74 greater than 1.0 km<sup>2</sup> were selected, 10 being land-bridge islands isolated about 12,000 years  
75 ago (Suguió *et al.*, 2005) and one sedimentary island (Ilha Comprida) which arose about  
76 5,000 years ago (Suguió *et al.*, 2003). The islands range in size from 1.1 to 451 km<sup>2</sup> and are  
77 0.1 to 38 km from the mainland (Table S2, Fig. 1). Bees were sampled from nests ( $n = 125$ ,

78 one per nest) and flowers ( $n = 877$ ) (Table S1). Samples were grouped into 17 populations, 14  
79 from the mainland and three from islands (Fig. 1).

80 We preserved the specimens in 96% ethanol for transport to the laboratory. DNA  
81 extraction followed the protocol described in Francisco *et al.* (2014). We dried the specimens  
82 at room temperature for 20 min prior to DNA extraction.

83

#### 84 *Mitochondrial DNA sequencing*

85 Two mitochondrial genes were partially sequenced: cytochrome c oxidase subunit 1 (*COI*)  
86 and cytochrome b (*Cytb*). Details about amplification and sequencing are given in Francisco  
87 *et al.* (2014).

88

#### 89 *Microsatellite genotyping*

90 The samples were genotyped for eleven microsatellite loci: Tang03, Tang11, Tang12,  
91 Tang17, Tang29, Tang57, Tang60, Tang65, Tang68, Tang70, and Tang77 (Brito *et al.*, 2009).  
92 PCR conditions for each locus are given in Francisco *et al.* (2014). Electrophoresis,  
93 visualization and genotyping were performed according to Francisco *et al.* (2011).

94 MICRO-CHECKER 2.2.3 (van Oosterhout *et al.*, 2004) was used to identify null alleles  
95 and scoring errors. COLONY 2.0.1.7 (Jones & Wang, 2010) was used to determine whether  
96 individuals collected in the same plant or places nearby were related. Samples were excluded  
97 from our data set if matched all of the following three criteria: collected at sites distant less  
98 than 2 km, indicated as related by COLONY, and sharing a mtDNA haplotype. Overall, 722 *T.*  
99 *angustula* bees from 17 populations were deemed suitable for further genetic analyses (Table  
100 1).

101 GENEPOP 4.1.2 (Rousset, 2008) was used to verify Hardy-Weinberg equilibrium  
102 (HWE) in populations and loci and to detect linkage disequilibrium (LD). Markov chain was

103 set for 10,000 dememorizations, 1,000 batches and 10,000 iterations per batch. In cases of  
104 multiple comparisons,  $P$ -values were corrected by applying Sequential Goodness of Fit test by  
105 the program SGOF 7.2 (Carvajal-Rodríguez *et al.*, 2009). This method is advantageous over  
106 other correction methods because it increases its statistical power with the increasing of the  
107 number of tests (Carvajal-Rodríguez *et al.*, 2009).

108

#### 109 *Genetic diversity*

110 ARLEQUIN 3.5.1.3 (Excoffier & Lischer, 2010) was used to calculate mtDNA haplotype ( $h$ )  
111 and nucleotide ( $\pi$ ) diversity. GENALEX 6.5 (Peakall & Smouse, 2006, 2012) was used to  
112 calculate microsatellite allelic richness ( $A$ ) and expected heterozygosity ( $H_E$ ). Since sample  
113 sizes were different, allelic richness was standardized by rarefaction ( $A_r$ ) using the program  
114 HP-RARE 1.0 (Kalinowski, 2005). Differences in  $A_r$  among populations were estimated by  
115 Mann-Whitney two-tailed U Test (Mann & Whitney, 1947). Inbreeding coefficients ( $F_{IS}$ )  
116 were calculated for each population with 10,000 permutations using ARLEQUIN.

117

#### 118 *Population differentiation and gene flow*

119 MEGA 5.2.1 (Tamura *et al.*, 2011) was used to calculate the number of base substitutions per  
120 site from mitochondrial sequences by averaging over all sequence pairs between populations  
121 using the Kimura 2-parameter (K2p) model (Kimura, 1980). Population pairwise  $\theta$  values (an  
122  $F_{ST}$  analogue, Weir & Cockerham 1984) were calculated with 10,000 permutations by  
123 ARLEQUIN using microsatellite alleles. When heterozygosity is high,  $F_{ST}$  and its analogues  
124 may not be appropriate measures of genetic differentiation (Hedrick, 2005; Jost, 2008; Heller  
125 & Siegismund, 2009). For this reason, Jost's  $D_{est}$  (Jost, 2008) was calculated. This statistic is  
126 not influenced by heterozygosity (Jost, 2008) and is more appropriate for microsatellite data  
127 (Heller & Siegismund, 2009). Global  $D_{est}$  was calculated with 9,999 permutations for mtDNA

128 and microsatellite data using GENALEX. Pairwise  $D_{est}$  was calculated only for microsatellite  
129 data. Mantel tests between genetic and geographical distances among populations were  
130 performed with 9999 permutations by GENALEX to verify isolation by distance for both  
131 molecular markers.

132 BAPS 6 (Corander *et al.*, 2008; Cheng *et al.*, 2013) was used to infer population  
133 structure using microsatellites and the geographic coordinates of the sampled individuals to  
134 spatially cluster them. BAPS 6 provides a Bayesian analysis of genetic population structure  
135 that creates  $K$  groups of individuals based on the similarity of their genotypes. The program  
136 was initially ran 5 times for each of  $K = 1$  to 17 and then 10 times for each of  $K = 5$  to 14.  
137 These results were used for admixture analysis with 200 iterations to estimate the admixture  
138 coefficients for the individuals, 200 simulated reference individuals per population and 20  
139 iterations to estimate the admixture coefficients of the reference individuals.

140 Estimates of rates and direction of current and/or recent migration ( $m$ ) between  
141 populations were determined by the program BAYESASS 3 (Wilson & Rannala, 2003) using  
142 microsatellites multilocus genotypes through Markov chain Monte Carlo (MCMC)  
143 techniques. We performed five independent runs with  $10^7$  MCMC iterations, burn-in of  $10^6$   
144 iterations and sampling frequency of 2,000. The delta values used were 0.25 (migration), 0.40  
145 (allele frequencies) and 0.55 (inbreeding).

146

#### 147 *Assessment of population demography*

148 To detect any recent bottleneck events we used the program BOTTLENECK 1.2.02 (Piry *et al.*,  
149 1999). We used the two-phased model (TPM) of mutation which is suggested as the most  
150 appropriate for microsatellites (Di Rienzo *et al.*, 1994). The variance among multiple steps  
151 was 12 and the proportion of stepwise mutation model in the TPM was 95% as suggested by

152 Piry *et al.* (1999). Altogether 10,000 iterations were performed. The significance of any  
153 deviation was determined with a Wilcoxon sign-rank test.

154

155

## 156 **Results**

### 157 *Island occurrences*

158 *Tetragonisca angustula* was found and collected on five of the 11 islands visited (Table 1).

159 However, only the samples from Ilha Grande, Ilha de São Sebastião and Ilha Comprida were  
160 included in the analyses. The other collections were not included due to small sample size  
161 (Ilha do Cardoso,  $n = 1$ ), and to individuals being highly related, with anecdotal reports of  
162 introduced nests (Ilha de Santa Catarina, see Francisco *et al.* (2014)).

163

### 164 *MtDNA diversity*

165 The *COI* gene sequences were 417 bp long (GenBank accession numbers KF222891-  
166 KF223893) and 32 haplotypes were identified. The *Cytb* sequences were 391 bp long  
167 (KF223894-KF224896) and generated 43 haplotypes. Most differences among haplotypes  
168 were synonymous substitutions, since the number of distinct amino acid sequences were four  
169 for *COI* and 15 for *Cytb*. We concatenated the nucleotide sequences (808 bp) for population  
170 analyses.

171 The 722 concatenated sequences defined 73 haplotypes. Since  $h$  and  $\pi$  were positively  
172 correlated ( $r = 0.510$ ,  $P = 0.036$ ,  $n = 17$ ) we hereafter use  $\pi$  as our measure of mtDNA  
173 diversity. Nucleotide diversity ranged from  $0.0006 \pm 0.0019$  (Passa Quatro) to  $0.0407 \pm$   
174  $0.0251$  (Ilha Comprida) (Table 1).

175 There was a non-significant positive correlation between the size of the sampled area  
176 and mtDNA diversity ( $r = 0.135$ ,  $P = 0.606$ ,  $n = 17$ ). The correlation between median



177 elevation and mtDNA diversity was negative but non-significant ( $r = -0.428$ ,  $P = 0.087$ ,  $n =$   
178 17).

179

### 180 *MtDNA differentiation*

181 Population structure was high. Of 73 haplotypes 67 were population-specific. We built a  
182 haplotype network where the frequency and distribution of haplotypes are shown (Fig. S1).  
183 The network shows a ‘star-pattern’ centered on four haplotypes. It illustrates the high number  
184 of endemic haplotypes, and the great number of nucleotide substitutions that separate the  
185 Porto União/Foz do Iguaçu populations from the others. The populations of Teresópolis,  
186 Resende, Prudentópolis, Angra dos Reis, and Ilha Grande all feature unique haplotypes.

187 Global  $D_{est}$  was 0.772 ( $P < 0.001$ ) indicating a highly significant population structure.  
188 The highest K2p values were found for Porto União/Foz do Iguaçu with respect to all other  
189 populations (2.809% to 3.306%) (Table 2).

190

### 191 *Microsatellite diversity*

192 After the Sequential Goodness of Fit correction, deviation from HWE was occasional, likely  
193 arising from type 1 error, and therefore no locus was removed from the analyses (Table S3).  
194 No significant LD was found between any pair of loci (all  $P > 0.05$ ).

195 Microsatellite diversity was moderate to high.  $A_r$  and  $H_E$  were positively correlated ( $r$   
196 = 0.787,  $P < 0.001$ ,  $n = 17$ ). Hereafter we use  $A_r$  as our measure of microsatellite diversity.  $A_r$   
197 was standardized for 22 individuals and ranged from 5.37 (Porto União) to 9.45 (Resende)  
198 (Table 1).  $A_r$  was significantly different only between Porto União and Resende ( $U = 93$ ,  $P =$   
199 0.033) and Porto União and Teresópolis ( $U = 29$ ,  $P = 0.039$ ).

200 There was a negative but non-significant correlation between  $A_r$  and size of the  
201 sampled area ( $r = -0.114$ ,  $P = 0.662$ ,  $n = 17$ ) and between  $A_r$  and median elevation ( $r = -$

202 0.084,  $P = 0.748$ ,  $n = 17$ ).

203 Six populations had inbreeding coefficients ( $F_{IS}$ ) significantly different from zero ( $P <$   
204 0.05). The highest  $F_{IS}$  (0.2177) was found in São José (Table 1).

205

### 206 *Microsatellite differentiation*

207 Global  $D_{est}$  was high (0.375,  $P < 0.001$ ) and indicates population structure. Pairwise  
208 comparisons also detected population structure, since most  $\theta$  values were between 0.05 and  
209 0.15 (Table S4) and most  $D_{est}$  values were higher than 0.25 (Table 3). Pairwise  $\theta$  and  $D_{est}$   
210 were positively correlated ( $r = 0.977$ ,  $P < 0.001$ ,  $n = 136$ ) and we use  $D_{est}$  as our measure of  
211 microsatellite differentiation hereafter.  $D_{est}$  ranged from 0.0204 (Guaratuba  $\times$  Blumenau) to  
212 0.8464 (Prudentópolis  $\times$  Foz do Iguaçu). High  $D_{est}$  values were always detected in  
213 comparisons between Porto União/Foz do Iguaçu and other populations. Low differentiation  
214 was observed in some populations near the coast (Iguape, Apiaí, Guaratuba, Blumenau, and  
215 São José) but also inland (Porto União  $\times$  Foz do Iguaçu and Prudentópolis  $\times$  Teodoro  
216 Sampaio).

217 Population structure was also suggested by the spatial cluster approach used by BAPS,  
218 which determined  $K = 10$  as the most likely optimal number of clusters (probability of  
219 98.99%). The clusters were [Foz do Iguaçu/Porto União], [Iguape/Apiaí/Guaratuba/  
220 Blumenau/São José], [Ilha Comprida], [São Sebastião], [Ilhabela], [Ilha Grande], [Passa  
221 Quatro], [Teodoro Sampaio/Prudentópolis], [Teresópolis], [Resende/Angra dos Reis] (Fig. 1).  
222  $D_{est}$  results are in good agreement with these clusters.

223 The results of the migration rates estimated in BAYESASS suggested a low level of gene  
224 flow throughout the studied area (Table S5). Only 15 out of 272 comparisons showed  $m > 0$   
225 between two populations. Most of the populations that showed evidence of gene flow are near  
226 the coast (Fig. 1), but inland populations such as Porto União  $\times$  Foz do Iguaçu also showed

227 evidence of gene flow. Migration is directional. For instance, the non-differentiation detected  
228 between Prudentópolis × Teodoro Sampaio is apparently due to a high migration rate (0.2486  
229 migrants per generation) from Prudentópolis to Teodoro Sampaio, whereas migration in the  
230 opposite direction was not detected (Table S5). The results obtained by BAYESASS are in good  
231 agreement with the population structure indicated by  $\theta$ ,  $D_{\text{est}}$  and BAPS.

232

### 233 *Isolation by distance*

234 There was a positive and significant correlation between geographic and genetic distance for  
235 both mitochondrial ( $r = 0.415$ ,  $P = 0.004$ ,  $n = 136$ ) and microsatellite markers ( $r = 0.464$ ,  $P <$   
236  $0.001$ ,  $n = 136$ ).

237

### 238 *Population demography*

239 We did not detect recent bottlenecks in any of the 17 populations (all  $P > 0.1392$ , Table S6).

240

241 **Discussion**

242 Our results show that *T. angustula* populations are highly differentiated as demonstrated by  
243 mtDNA and microsatellite markers. This suggests that both females and males have low  
244 dispersal distance.

245 Per population mtDNA nucleotide diversity ( $\pi$ ) ranged from low to high. High  $\pi$   
246 suggests that a population had a long evolutionary history and a large effective population  
247 size. Low  $\pi$  may be explained by lineage sorting or suggest that a population bottleneck has  
248 occurred in the past (Avice, 2000). The characteristic star shape of the *T. angustula* haplotype  
249 network provides evidence of relatively recent local extinction, re-colonization, and  
250 population expansion. Several phylogeographic studies of vertebrate and invertebrate  
251 populations, conducted in some of the areas that we studied, also found low mtDNA  
252 nucleotide diversity (Cabanne *et al.*, 2007; Carnaval *et al.*, 2009; Batalha-Filho *et al.*, 2010;  
253 Brito & Arias, 2010; Francisco & Arias, 2010; D'Horta *et al.*, 2011; Bell *et al.*, 2012). As  
254 argued in these papers, changes in sea level during the Pleistocene generated population  
255 bottlenecks followed by species expansion, and this is reflected in localized low nucleotide  
256 diversity to this day. Therefore, it is likely that populations that have high mtDNA diversity  
257 (e.g. Angra dos Reis) did not experience recent bottlenecks, while populations with low  
258 mtDNA diversity (e.g. Passa Quatro) are in regions that likely arose by a recent population  
259 expansion.

260 Overall, we found high mitochondrial genetic differentiation between populations.  
261 Similar population structuring has been observed for other stingless bee species (Brilo &  
262 Arias, 2010; Francisco & Arias, 2010; Quezada-Euán *et al.*, 2012; Brito *et al.*, 2013;  
263 Francisco *et al.*, 2013). The mtDNA population structure of stingless bees probably arises  
264 from their reproductive behavior. Nonetheless, some populations are not well differentiated

265 from others. This is likely due to gene natural flow, although human transportation also likely  
266 plays a role. For instance, haplotypes 34, 35, and 36 all found in Ilha Comprida, were similar  
267 to those found in Passa Quatro/Teodoro Sampaio (34 and 36) and Teresópolis (35) (Fig. S1).  
268 Due to the high frequency of endemic haplotypes, and the physical distance between these  
269 populations, we suggest that nests have been transported to Ilha Comprida causing an  
270 artificial increase in this population's mtDNA diversity.

271 Nuclear genetic diversity was moderate to high in all populations. Microsatellite  
272 diversity was not significantly different between populations except for Porto União. This  
273 result shows that the ecological features of each sampling site are not influencing the  
274 molecular diversity. Indeed, variables such as size of the sampled area and median elevation  
275 were not significantly correlated with genetic diversity for both mtDNA and microsatellites.  
276 Moreover, our results did not detect recent bottleneck (e.g. due to habitat fragmentation) in  
277 any of the studied populations. However, it is worth emphasizing that theoretical and practical  
278 studies have shown that habitat fragmentation affects immediately the genetic structure by  
279 increasing it, while the reduction of genetic diversity may take longer (Varvio *et al.*, 1986;  
280 Keyghobadi *et al.*, 2005). According to this statement, it will be necessary to monitor the  
281 genetic diversity of *T. angustula* populations studied over years, since currently high structure  
282 was detected.

283 Evidence of inbreeding was found in six populations (Angra dos Reis, Blumenau, São  
284 José, Porto União, Foz do Iguaçu and Teodoro Sampaio). This might be an artifact caused by  
285 Wahlund effect (Hartl & Clark, 2007) and/or a consequence of the low dispersal of *T.*  
286 *angustula*. If the latter is true, the persistence of these populations is at risk (Keller & Waller,  
287 2002).

288 Microsatellite data also indicated high genetic structuring and low gene flow among  
289 populations. This suggests that like females, the dispersal distance of males is also quite

290 limited even between populations separated by 34 km of continuous forest. It is interesting  
291 here to note that all island populations were differentiated from their mainland counterparts,  
292 indicating that males do not cross water for distances as short as 300 m. The program  
293 BAYESASS suggested that the highest migration rate is from Prudentópolis to Teodoro  
294 Sampaio, populations separated by more than 300 km. These two populations do not share  
295 any mtDNA haplotypes suggesting that this gene flow is mediated only by males following  
296 the stepping stone model (Kimura & Weiss, 1964).

297         For both markers population clusters appear to be unrelated to physical barriers (such  
298 as rivers or mountain ranges) or forest presence, indicating that genetic connectivity demands  
299 more than just habitat connectivity (Marsden *et al.*, 2012). Populations may diverge even  
300 when there are no apparent obstacles to gene flow due to low dispersal, geographic distance  
301 and genetic drift (isolation by distance). Overall, the population structure of *T. angustula* is  
302 shaped by isolation by distance.

303         The highest genetic divergence observed was between Porto União/Foz do Iguacu and  
304 the remaining populations. At least 15 mtDNA mutation steps separate these two populations  
305 from the others. This represents about 2.8 to 3.3% divergence, which is as high as the  
306 divergence between lineages A and Y of *Apis mellifera* (Franck *et al.*, 2001), which are  
307 thought to have diverged over one million years ago (Whitfield *et al.*, 2006). Francisco *et al.*  
308 (2014) suggested that bees from Porto União and Foz do Iguacu might belong to the  
309 subspecies *T. angustula fiebrigi* while the others to *T. angustula angustula*.

310         Among the islands we visited only Ilha do Mel (Zanella, 2005), Ilha de Santa Catarina  
311 (Steiner *et al.*, 2006) and Ilha Grande (Lorenzon *et al.*, 2006) had been previously surveyed  
312 for bees and *T. angustula* was reported on all of them. We did not locate *T. angustula* on six  
313 of the 11 islands we visited. Our failure to verify *T. angustula* on most islands may be due its  
314 ancestral absence on the islands when they became isolated or to its extinction after isolation.

315 The constraint on queen dispersal prevents (re)colonization of islands whose distance from  
316 the mainland is greater than a few hundred of meters. Even if (re)colonization has occurred,  
317 its establishment may not have been successful. With low dispersal, *T. angustula* has low  
318 effective population size and high extinction rate. Island size may be critical to the survival of  
319 viable *T. angustula* populations – we were unable to locate them on any island less than 28  
320 km<sup>2</sup>. Competition among colonies doubtless limits the number of colonies an island can  
321 support so that small islands may not be able to maintain viable populations of *T. angustula*.  
322 The rarity of stingless bee species on islands has been noted elsewhere (Schwartz-Filho &  
323 Laroça, 1999; Zanella, 2005).

324 Our results indicate that *T. angustula* is not genetically homogeneous across the  
325 studied area. Considering that this species has a continental distribution, we speculate this  
326 species is ancient and includes wide range of genetically different taxa with the same (or  
327 similar) morphology. Sampling across its entire distribution range is needed to elucidate its  
328 taxonomic status as well as its evolutionary history.

329

330

### 331 **Acknowledgments**

332 We are grateful to Paulo Henrique P. Gonçalves for his help with the sampling and to Susy  
333 Coelho and Julie Lim for technical assistance. We thank Adilson de Godoy, Carlos Chociai,  
334 Flávio Haupenthal, Geraldo Moretto, Marcos Wasilewski, Marcos Antonio, Renato Marques,  
335 José Moisés, André Trindade, Teófilo, Eduardo da Silva, Guaraci Cordeiro, Marcos Fujimoto,  
336 PC Fernandes, Samuel Boff, Thaiomara Alves, the managers and the staff of the Parks, the  
337 residents of Ilha da Vitória, Ilha de Búzios and Ilha Monte de Trigo, and countless people  
338 who assisted us in the fieldwork. We thank Dr. Jeffrey Lozier for comments on an early  
339 version of this manuscript. For permits, we thank Instituto Brasileiro do Meio Ambiente e dos

340 Recursos Naturais Renováveis (IBAMA) and Instituto Chico Mendes de Conservação da  
341 Biodiversidade (ICMBio) (18457-1), Instituto Florestal do estado de São Paulo (260108 -  
342 000.000.002.517/0 2008), Instituto Ambiental do estado do Paraná (128/09) and Instituto  
343 Estadual do Ambiente do Rio de Janeiro (E-07/300.011/0). This work was supported by  
344 Fundação de Amparo à Pesquisa do Estado de São Paulo (04/15801-0; 08/07417-6; 08/08546-  
345 4; 10/18716-4; 10/50597-5) and Australian Research Council. This work was developed in the  
346 Research Center on Biodiversity and Computing (BioComp) of the Universidade de São  
347 Paulo (USP), supported by the USP Provost's Office for Research.

348

349

350 **Disclosure**

351 The authors have no conflict of interest.



352 **References**

- 353 Avise, J.C. (2000) *Phylogeography: The History and Formation of Species*. Harvard  
354 University Press, Cambridge, MA.
- 355 Baitala, T.V., Mangolin, C.A., Toledo, V.A.A. and Ruvolo-Takasusuki, M.C.C. (2006) RAPD  
356 polymorphism in *Tetragonisca angustula* (Hymenoptera; Meliponinae, Trigonini)  
357 populations. *Sociobiology*, 48, 1–13.
- 358 Batalha-Filho, H., Waldschmidt, A.M., Campos, L.A.O., Tavares, M.G. and Fernandes-  
359 Salomão, T.M. (2010) Phylogeography and historical demography of the neotropical  
360 stingless bee *Melipona quadrifasciata* (Hymenoptera, Apidae): incongruence between  
361 morphology and mitochondrial DNA. *Apidologie*, 41, 534–547.
- 362 Batista, M.A., Ramalho, M. and Soares, A.E.E. (2003) Nesting sites and abundance of  
363 Meliponini (Hymenoptera: Apidae) in heterogeneous habitats of the Atlantic Rain Forest.  
364 *Lundiana*, 4, 19–23.
- 365 Bell, R.C., Brasileiro, C.A., Haddad, C.F.B. and Zamudio, K.R. (2012) Evolutionary history  
366 of *Scinax* treefrogs on land-bridge islands in south-eastern Brazil. *Journal of*  
367 *Biogeography*, 39, 1733–1742.
- 368 Brito, R.M. and Arias, M.C. (2010) Genetic structure of *Partamona helleri* (Apidae,  
369 Meliponini) from Neotropical Atlantic rainforest. *Insectes Sociaux*, 57, 413–419.
- 370 Brito, R.M., Francisco, F.O., Domingues-Yamada, A.M.T., Gonçalves, P.H.P., Pioker, F.C.,  
371 Soares, A.E.E. and Arias, M.C. (2009) Characterization of microsatellite loci of  
372 *Tetragonisca angustula* (Hymenoptera, Apidae, Meliponini). *Conservation Genetics*  
373 *Resources*, 1, 183–187.
- 374 Brito, R.M., Francisco, F.O., Franço, E., Santiago, L.R. and Arias, M.C. (2013) Very low  
375 mitochondrial variability in a stingless bee endemic to cerrado. *Genetics and Molecular*  
376 *Biology*, 36, 124–128.
- 377 Cabanne, G.S., Santos, F.R. and Miyaki, C.Y. (2007) Phylogeography of *Xiphorhynchus*  
378 *fuscus* (Passeriformes, Dendrocolaptidae): vicariance and recent demographic expansion  
379 in southern Atlantic forest. *Biological Journal of the Linnean Society*, 91, 73–84.
- 380 Camargo, J.M.F. and Pedro, S.M. (2013) Meliponini Lepeletier, 1836. *Catalogue of Bees*  
381 *(Hymenoptera, Apoidea) in the Neotropical Region - online version* (eds J.S. Moure, D.  
382 Urban & G.A.R. Melo), available at <http://www.moure.cria.org.br/catalogue>. Accessed  
383 Apr/02/2015.
- 384 Cameron, E.C., Franck, P. and Oldroyd, B.P. (2004) Genetic structure of nest aggregations  
385 and drone congregations of the southeast Asian stingless bee *Trigona collina*. *Molecular*  
386 *Ecology*, 13, 2357–2364.
- 387 Carnaval, A.C., Hickerson, M.J., Haddad, C.F.B., Rodrigues, M.T. and Moritz, C. (2009)  
388 Stability predicts genetic diversity in the Brazilian Atlantic Forest hotspot. *Science*, 323,

- 389 785–789.
- 390 Carvajal-Rodríguez, A., Uña-Alvarez, J. and Rolán-Alvarez, E. (2009) A new multitest  
391 correction (SGoF) that increases its statistical power when increasing the number of  
392 tests. *BMC Bioinformatics*, 10, 209.
- 393 Cheng, L., Connor, T.R., Sirén, J., Aanensen, D.M. and Corander, J. (2013) Hierarchical and  
394 spatially explicit clustering of DNA sequences with BAPS software. *Molecular Biology  
395 and Evolution*, 30, 1224–1228.
- 396 Corander, J., Sirén, J. and Arjas, E. (2008) Bayesian spatial modeling of genetic population  
397 structure. *Computational Statistics*, 23, 111–129.
- 398 Cortopassi-Laurino, M. (2007) Drone congregations in Meliponini: what do they tell us?  
399 *Bioscience Journal*, 23, 153–160.
- 400 Cortopassi-Laurino, M., Imperatriz-Fonseca, V.L., Roubik, D.W., Dollin, A., Heard, T.,  
401 Aguilar, I.B., *et al.* (2006) Global Meliponiculture: challenges and opportunities.  
402 *Apidologie*, 37, 1–18.
- 403 D’Horta, F.M., Cabanne, G.S., Meyer, D. and Miyaki, C.Y. (2011) The genetic effects of Late  
404 Quaternary climatic changes over a tropical latitudinal gradient: diversification of an  
405 Atlantic Forest passerine. *Molecular Ecology*, 20, 1923–1935.
- 406 Excoffier, L. and Lischer, H.E. (2010) Arlequin suite ver 3.5: a new series of programs to  
407 perform population genetics analyses under Linux and Windows. *Molecular Ecology  
408 Resources*, 10, 564–567.
- 409 Francisco, F.O. and Arias, M.C. (2010) Inferences of evolutionary and ecological events that  
410 influenced the population structure of *Plebeia remota*, a stingless bee from Brazil.  
411 *Apidologie*, 41, 216–224.
- 412 Francisco, F.O., Brito, R.M., Santiago, L.R., Gonçalves, P.H.P., Pioker, F.C., Domingues-  
413 Yamada, A.M.T. and Arias, M.C. (2011) Isolation and characterization of 15  
414 microsatellite loci in the stingless bee *Plebeia remota* (Apidae: Meliponini).  
415 *Conservation Genetics Resources*, 3, 417–419.
- 416 Francisco, F.O., Santiago, L.R. and Arias, M.C. (2013) Molecular genetic diversity in  
417 populations of the stingless bee *Plebeia remota*: A case study. *Genetics and Molecular  
418 Biology*, 36, 118–123.
- 419 Francisco, F.O., Santiago, L.R., Brito, R.M., Oldroyd, B.P. and Arias, M.C. (2014)  
420 Hybridization and asymmetric introgression between *Tetragonisca angustula* and  
421 *Tetragonisca fiebrigi*. *Apidologie*, 45, 1–9.
- 422 Franck, P., Garnery, L., Loiseau, A., Oldroyd, B.P., Hepburn, H.R., Solignac, M. and  
423 Cornuet, J.-M. (2001) Genetic diversity of the honeybee in Africa: microsatellite and  
424 mitochondrial data. *Heredity*, 86, 420–430.

- 425 Hartl, D.L. and Clark, A.G. (2007) *Principles of Population Genetics*, 4th edn. Sinauer  
426 Associates, Inc., Sunderland, MA.
- 427 Hedrick, P.W. (2005) A standardized genetic differentiation measure. *Evolution*, 59, 1633–  
428 1638.
- 429 Heller, R. and Siegismund, H.R. (2009) Relationship between three measures of genetic  
430 differentiation  $G_{ST}$ ,  $DEST$  and  $G^*ST$ : how wrong have we been? *Molecular Ecology*,  
431 18, 2080–2083.
- 432 Jones, O.R. and Wang, J. (2010) colony: a program for parentage and sibship inference from  
433 multilocus genotype data. *Molecular Ecology Resources*, 10, 551–555.
- 434 Jost, L. (2008)  $G_{ST}$  and its relatives do not measure differentiation. *Molecular Ecology*, 17,  
435 4015–4026.
- 436 Kalinowski, S.T. (2005) hp-rare 1.0: a computer program for performing rarefaction on  
437 measures of allelic richness. *Molecular Ecology Notes*, 5, 187–189.
- 438 Keller, L.F. and Waller, D.M. (2002) Inbreeding effects in wild populations. *Trends in*  
439 *Ecology and Evolution*, 17, 230–241.
- 440 Keyghobadi, N., Roland, J., Matter, S.F. and Strobeck, C. (2005) Among- and within-patch  
441 components of genetic diversity respond at different rates to habitat fragmentation: an  
442 empirical demonstration. *Proceedings of the Royal Society B*, 272, 553–560.
- 443 Kimura, M. (1980) A simple method for estimating evolutionary rates of base substitutions  
444 through comparative studies of nucleotide sequences. *Journal of Molecular Evolution*,  
445 16, 111–120.
- 446 Kimura, M. and Weiss, G.H. (1964) The stepping stone model of population structure and the  
447 decrease of genetic correlation with distance. *Genetics*, 49, 561–576.
- 448 Kraus, F.B., Weinhold, S. and Moritz, R.F.A. (2008) Genetic structure of drone congregations  
449 of the stingless bee *Scaptotrigona mexicana*. *Insectes Sociaux*, 55, 22–27.
- 450 Lindauer, M. and Kerr, W.E. (1960) Communication between the workers of stingless bees.  
451 *Bee World*, 41, 29–41, 65–71.
- 452 Lorenzon, M.C.A., Conde, M.M.S. and Barbosa, C.G. (2006) Eusocial Apidae in tropical  
453 insular region. *Brazilian Archives of Biology and Technology*, 49, 733–738.
- 454 Mann, H.B. and Whitney, D.R. (1947) On a test of whether one of two random variables is  
455 stochastically larger than the other. *The Annals of Mathematical Statistics*, 18, 50–60.
- 456 Marsden, C.D., Woodroffe, R., Mills, M.G.L., McNutt, J.W., Creel, S., Groom, R., *et al.*  
457 (2012) Spatial and temporal patterns of neutral and adaptive genetic variation in the  
458 endangered African wild dog (*Lycaon pictus*). *Molecular Ecology*, 21, 1379–1393.
- 459 Michener, C.D. (2007) *The Bees of the World*, 2nd edn. Johns Hopkins University Press,  
460 Baltimore, MD.

- 461 Mueller, M.Y., Moritz, R.F.A. and Kraus, F.B. (2012) Outbreeding and lack of temporal  
462 genetic structure in a drone congregation of the neotropical stingless bee *Scaptotrigona*  
463 *mexicana*. *Ecology and Evolution*, 2, 1304–1311.
- 464 Nogueira-Neto, P. (1997) *Vida e Criação de Abelhas Indígenas Sem Ferrão*. Nogueirapis,  
465 São Paulo, SP.
- 466 Oliveira, R.C., Nunes, F.M.F., Campos, A.P.S., Vasconcelos, S.M., Roubik, D., Goulart, L.R.  
467 and Kerr, W.E. (2004) Genetic divergence in *Tetragonisca angustula* Latreille, 1811  
468 (Hymenoptera, Meliponinae, Trigonini) based on RAPD markers. *Genetics and*  
469 *Molecular Biology*, 27, 181–186.
- 470 van Oosterhout, C., Hutchinson, W.F., Wills, D.P.M. and Shipley, P. (2004) micro-checker:  
471 software for identifying and correcting genotyping errors in microsatellite data.  
472 *Molecular Ecology Notes*, 4, 535–538.
- 473 Palmer, K.A., Oldroyd, B.P., Quezada-Euán, J.J.G., Paxton, R.J. and May-Itzá, W.J. (2002)  
474 Paternity frequency and maternity of males in some stingless bee species. *Molecular*  
475 *Ecology*, 11, 2107–2113.
- 476 Paxton, R.J. (2000) Genetic structure of colonies and a male aggregation in the stingless bee  
477 *Scaptotrigona postica*, as revealed by microsatellite analysis. *Insectes Sociaux*, 47, 63–  
478 69.
- 479 Peakall, R. and Smouse, P.E. (2006) genalex 6: genetic analysis in Excel. Population genetic  
480 software for teaching and research. *Molecular Ecology Notes*, 6, 288–295.
- 481 Peakall, R. and Smouse, P.E. (2012) GenAlEx 6.5: Genetic analysis in Excel. Population  
482 genetic software for teaching and research – an update. *Bioinformatics*, 28, 2537–2539.
- 483 Peters, J.M., Queller, D.C., Imperatriz-Fonseca, V.L., Roubik, D.W. and Strassmann, J.E.  
484 (1999) Mate number, kin selection and social conflicts in stingless bees and honeybees.  
485 *Proceedings of the Royal Society B*, 266, 379–384.
- 486 Piry, S., Luikart, G. and Cornuet, J.-M. (1999) BOTTLENECK: a computer program for  
487 detecting recent reductions in the effective size using allele frequency data. *Journal of*  
488 *Heredity*, 90, 502–503.
- 489 Quezada-Euán, J.J.G., May-Itzá, W.J., Rincón, M., De la Rúa, P. and Paxton, R.J. (2012)  
490 Genetic and phenotypic differentiation in endemic *Scaptotrigona hellwegeri* (Apidae:  
491 Meliponini): implications for the conservation of stingless bee populations in contrasting  
492 environments. *Insect Conservation and Diversity*, 5, 433–443.
- 493 Di Rienzo, A., Peterson, A.C., Garza, J.C., Valdes, A.M., Slatkin, M. and Freimer, N.B.  
494 (1994) Mutational processes of simple-sequence repeat loci in human populations.  
495 *Proceedings of the National Academy of Sciences of the United States of America*, 91,  
496 3166–3170.
- 497 Rousset, F. (2008) Genepop'007: a complete re-implementation of the genepop software for

- 498 Windows and Linux. *Molecular Ecology Resources*, 8, 103–106.
- 499 Schwartz-Filho, D. and Laroca, S. (1999) A comunidade de abelhas silvestres (Hymenoptera,  
500 Apoidea) da Ilha das Cobras (Paraná, Brasil) aspectos ecológicos e biogeográficos. *Acta*  
501 *Biológica Paranaense*, 28, 19–108.
- 502 Silveira, F.A., Melo, G.A.R. and Almeida, E.A.B. (2002) *Abelhas Brasileiras: Sistemática e*  
503 *Identificação*. Fundação Araucária, Belo Horizonte, MG.
- 504 Slaa, E.J. (2006) Population dynamics of a stingless bee community in the seasonal dry  
505 lowlands of Costa Rica. *Insectes Sociaux*, 53, 70–79.
- 506 Steiner, J., Harter-Marques, B., Zillikens, A. and Feja, E.P. (2006) Bees of Santa Catarina  
507 Island, Brazil - a first survey and checklist (Insecta: Apoidea). *Zootaxa*, 1220, 1–18.
- 508 Stuchi, A.L.P.B., Ruvolo-Takasusuki, M.C.C. and Toledo, V.A.A. (2008) Análise da genética  
509 de populações em abelhas jataí (*Tetragonisca angustula* Latreille) por meio de  
510 isoenzimas. *Magistra*, 20, 68–77.
- 511 Suguio, K., Angulo, R.J., Carvalho, A.M., Corrêa, A.M., Tomazelli, L.J., Willwock, J.A. and  
512 Vital, H. (2005) Paleoníveis do mar e paleolinhas de costa. *Quaternário do Brasil* (eds  
513 C.R.G. Souza, K. Suguio, A.M.S. Oliveira & P.E. Oliveira), pp. 114–129. Associação  
514 Brasileira de Estudos do Quaternário, São Paulo.
- 515 Suguio, K., Tatum, S.H., Kowata, E.A., Munita, C.S. and Paiva, R.P. (2003) Upper  
516 Pleistocene deposits of the Comprida Island (São Paulo State) dated by  
517 thermoluminescence method. *Anais da Academia Brasileira de Ciências*, 75, 91–96.
- 518 Tamura, K., Peterson, D., Peterson, N., Stecher, G., Nei, M. and Kumar, S. (2011) MEGA5:  
519 Molecular Evolutionary Genetics Analysis using maximum likelihood, evolutionary  
520 distance, and maximum parsimony methods. *Molecular Biology and Evolution*, 28,  
521 2731–2739.
- 522 Varvio, S.-L., Chakraborty, R. and Nei, M. (1986) Genetic variation in subdivided  
523 populations and conservation genetics. *Heredity*, 57, 189–198.
- 524 van Veen, J.W. and Sommeijer, M.J. (2000a) Colony reproduction in *Tetragonisca angustula*  
525 (Apidae, Meliponini). *Insectes Sociaux*, 47, 70–75.
- 526 van Veen, J.W. and Sommeijer, M.J. (2000b) Observations on gynes and drones around  
527 nuptial flights in the stingless bees *Tetragonisca angustula* and *Melipona beecheii*  
528 (Hymenoptera, Apidae, Meliponinae). *Apidologie*, 31, 47–54.
- 529 Velez-Ruiz, R.I., Gonzalez, V.H. and Engel, M.S. (2013) Observations on the urban ecology  
530 of the Neotropical stingless bee *Tetragonisca angustula* (Hymenoptera: Apidae:  
531 Meliponini). *Journal of Melittology*, 15, 1–8.
- 532 Velthuis, H.H.W., Koedam, D. and Imperatriz-Fonseca, V.L. (2005) The males of *Melipona*  
533 and other stingless bees, and their mothers. *Apidologie*, 36, 169–185.

- 534 Weir, B.S. and Cockerham, C.C. (1984) Estimating  $F$ -statistics for the analysis of population  
535 structure. *Evolution*, 38, 1358–1370.
- 536 Whitfield, C.W., Behura, S.K., Berlocher, S.H., Clark, A.G., Johnston, J.S., Sheppard, W.S.,  
537 *et al.* (2006) Thrice out of Africa: ancient and recent expansions of the honey bee, *Apis*  
538 *mellifera*. *Science*, 314, 642–645.
- 539 Wilson, G.A. and Rannala, B. (2003) Bayesian inference of recent migration rates using  
540 multilocus genotypes. *Genetics*, 163, 1177–1191.
- 541 Zanella, F.C.V. (2005) Abelhas da Ilha do Mel: estrutura da comunidade, relações  
542 biogeográficas e variação sazonal. *História Natural e Conservação da Ilha do Mel* (eds  
543 M.C.M. Marques & R.M. Britez), pp. 189–208. Editora da UFPR, Curitiba.
- 544

545 **Table 1** Population characteristics and genetic diversity in *Tetragonisca angustula* populations. SA: sampled area in square kilometers. ME:  
 546 median elevation in meters. N: sample size. NH: number of haplotypes.  $h \pm sd$ : haplotype diversity and standard deviation.  $\pi \pm sd$ : nucleotide  
 547 diversity and standard deviation.  $Ar \pm se$ : allelic richness after rarefaction for 22 individuals and standard error.  $H_E \pm se$ : expected heterozygosity  
 548 and standard error.  $F_{IS}$ : inbreeding coefficient.

| Population                      | SA<br>(km <sup>2</sup> ) | ME<br>(m) | N  | NH | $h \pm sd$    | $\pi \pm sd$    | $Ar \pm se$ | $H_E \pm se$  | $F_{IS}$ |
|---------------------------------|--------------------------|-----------|----|----|---------------|-----------------|-------------|---------------|----------|
| 1. Teresópolis (TERE)           | 253                      | 939       | 46 | 5  | 0.207 ± 0.079 | 0.0087 ± 0.0080 | 9.07 ± 1.27 | 0.770 ± 0.045 | 0.0251   |
| 2. Resende (RESE)               | 10                       | 444       | 44 | 3  | 0.394 ± 0.072 | 0.0065 ± 0.0066 | 9.45 ± 1.40 | 0.773 ± 0.054 | 0.0248   |
| 3. Passa Quatro (PASQ)          | 385                      | 911       | 48 | 2  | 0.042 ± 0.039 | 0.0006 ± 0.0019 | 6.02 ± 0.97 | 0.626 ± 0.082 | -0.0185  |
| 4. Angra dos Reis (ANGR)        | 1208                     | 12        | 57 | 7  | 0.642 ± 0.049 | 0.0369 ± 0.0225 | 8.97 ± 1.47 | 0.769 ± 0.041 | 0.0463*  |
| 5. Ilha Grande (IGRA)           | 193 <sup>&amp;</sup>     | 11        | 57 | 5  | 0.687 ± 0.032 | 0.0153 ± 0.0116 | 6.50 ± 1.26 | 0.682 ± 0.057 | 0.0247   |
| 6. São Sebastião (SSEB)         | 117                      | 14        | 46 | 3  | 0.478 ± 0.052 | 0.0075 ± 0.0072 | 8.05 ± 1.32 | 0.712 ± 0.050 | 0.0088   |
| 7. Ilha de São Sebastião (IBEL) | 336 <sup>&amp;</sup>     | 25        | 49 | 3  | 0.190 ± 0.072 | 0.0036 ± 0.0047 | 6.11 ± 0.98 | 0.636 ± 0.061 | 0.0062   |
| 8. Iguape (GUAP)                | 67                       | 13        | 38 | 3  | 0.152 ± 0.077 | 0.0070 ± 0.0070 | 6.75 ± 1.13 | 0.637 ± 0.080 | -0.0353  |
| 9. Ilha Comprida (ICOM)         | 200 <sup>&amp;</sup>     | 10        | 22 | 4  | 0.398 ± 0.122 | 0.0407 ± 0.0251 | 5.64 ± 0.69 | 0.659 ± 0.054 | 0.0381   |
| 10. Apiaí (APIA)                | 504                      | 161       | 45 | 6  | 0.625 ± 0.068 | 0.0152 ± 0.0115 | 7.35 ± 1.40 | 0.634 ± 0.086 | 0.0142   |
| 11. Guaratuba (GUAR)            | 341                      | 15        | 36 | 6  | 0.636 ± 0.061 | 0.0233 ± 0.0159 | 7.02 ± 1.28 | 0.611 ± 0.084 | 0.038    |
| 12. Blumenau (BLUM)             | 389                      | 36        | 45 | 8  | 0.628 ± 0.062 | 0.0127 ± 0.0102 | 7.38 ± 1.48 | 0.594 ± 0.102 | 0.0857** |
| 13. São José (SJOS)             | 841                      | 11        | 24 | 5  | 0.493 ± 0.116 | 0.0084 ± 0.0080 | 7.29 ± 1.48 | 0.604 ± 0.092 | 0.2177** |
| 14. Prudentópolis (PRUD)        | 885                      | 811       | 42 | 5  | 0.302 ± 0.089 | 0.0049 ± 0.0056 | 6.35 ± 0.97 | 0.621 ± 0.070 | 0.0404   |
| 15. Porto União (PUNI)          | 1521                     | 913       | 35 | 5  | 0.506 ± 0.090 | 0.0086 ± 0.0080 | 5.37 ± 0.94 | 0.513 ± 0.072 | 0.0832** |
| 16. Foz do Iguaçu (FOZI)        | 5148                     | 543       | 43 | 9  | 0.632 ± 0.074 | 0.0157 ± 0.0119 | 6.59 ± 1.15 | 0.555 ± 0.064 | 0.1389** |
| 17. Teodoro Sampaio (TSAM)      | 5550                     | 440       | 45 | 9  | 0.716 ± 0.058 | 0.0179 ± 0.0130 | 7.22 ± 1.13 | 0.616 ± 0.081 | 0.0965** |

549 <sup>&</sup>: island area; \*:  $P < 0.05$ ; \*\*:  $P < 0.01$ .



550 **Table 2** Estimates of evolutionary divergence over sequence pairs between populations of *Tetragonisca angustula*. The number of base  
551 substitutions per site from averaging over all sequence pairs between populations are shown. Analyses were conducted using the Kimura 2-  
552 parameter model (Kimura, 1980) and involved 722 nucleotide sequences. Population abbreviations as in Table 1.

|      | TERE   | RESE   | PASQ   | ANGR   | IGRA   | SSEB   | IBEL   | GUAP   | ICOM   | APIA   | GUAR   | BLUM   | SJOS   | PRUD   | PUNI   | FOZI   |
|------|--------|--------|--------|--------|--------|--------|--------|--------|--------|--------|--------|--------|--------|--------|--------|--------|
| RESE | 0.0071 |        |        |        |        |        |        |        |        |        |        |        |        |        |        |        |
| PASQ | 0.0085 | 0.0109 |        |        |        |        |        |        |        |        |        |        |        |        |        |        |
| ANGR | 0.0077 | 0.0101 | 0.0067 |        |        |        |        |        |        |        |        |        |        |        |        |        |
| IGRA | 0.0079 | 0.0103 | 0.0069 | 0.0042 |        |        |        |        |        |        |        |        |        |        |        |        |
| SSEB | 0.0094 | 0.0118 | 0.0083 | 0.0064 | 0.0076 |        |        |        |        |        |        |        |        |        |        |        |
| IBEL | 0.0084 | 0.0108 | 0.0074 | 0.0056 | 0.0066 | 0.0010 |        |        |        |        |        |        |        |        |        |        |
| GUAP | 0.0088 | 0.0111 | 0.0077 | 0.0058 | 0.0070 | 0.0012 | 0.0004 |        |        |        |        |        |        |        |        |        |
| ICOM | 0.0082 | 0.0111 | 0.0067 | 0.0062 | 0.0072 | 0.0028 | 0.0020 | 0.0000 |        |        |        |        |        |        |        |        |
| APIA | 0.0084 | 0.0107 | 0.0078 | 0.0057 | 0.0073 | 0.0016 | 0.0008 | 0.0022 | 0.0025 |        |        |        |        |        |        |        |
| GUAR | 0.0089 | 0.0113 | 0.0073 | 0.0061 | 0.0072 | 0.0020 | 0.0012 | 0.0014 | 0.0028 | 0.0017 |        |        |        |        |        |        |
| BLUM | 0.0083 | 0.0111 | 0.0078 | 0.0060 | 0.0071 | 0.0015 | 0.0007 | 0.0009 | 0.0024 | 0.0013 | 0.0017 |        |        |        |        |        |
| SJOS | 0.0089 | 0.0113 | 0.0079 | 0.0059 | 0.0071 | 0.0012 | 0.0005 | 0.0007 | 0.0023 | 0.0011 | 0.0015 | 0.0010 |        |        |        |        |
| PRUD | 0.0099 | 0.0123 | 0.0015 | 0.0081 | 0.0083 | 0.0097 | 0.0088 | 0.0090 | 0.0081 | 0.0092 | 0.0087 | 0.0092 | 0.0092 |        |        |        |
| PUNI | 0.0319 | 0.0317 | 0.0295 | 0.0315 | 0.0339 | 0.0329 | 0.0319 | 0.0319 | 0.0321 | 0.0317 | 0.0314 | 0.0323 | 0.0323 | 0.0308 |        |        |
| FOZI | 0.0311 | 0.0309 | 0.0287 | 0.0308 | 0.0331 | 0.0321 | 0.0312 | 0.0312 | 0.0313 | 0.0310 | 0.0306 | 0.0315 | 0.0315 | 0.0301 | 0.0012 |        |
| TSAM | 0.0088 | 0.0111 | 0.0009 | 0.0070 | 0.0072 | 0.0085 | 0.0076 | 0.0079 | 0.0071 | 0.0081 | 0.0076 | 0.0081 | 0.0081 | 0.0023 | 0.0297 | 0.0289 |



554

**Table 3** Pairwise index of differentiation ( $D_{\text{est}}$ ) from microsatellite data of *Tetragonisca angustula*. Population abbreviations as in Table 1.

|      | TERE   | RESE   | PASQ   | ANGR   | IGRA   | SSEB   | IBEL   | GUAP   | ICOM   | APIA   | GUAR   | BLUM   | SJOS   | PRUD   | PUNI   | FOZI   |
|------|--------|--------|--------|--------|--------|--------|--------|--------|--------|--------|--------|--------|--------|--------|--------|--------|
| RESE | 0.1074 |        |        |        |        |        |        |        |        |        |        |        |        |        |        |        |
| PASQ | 0.2821 | 0.2177 |        |        |        |        |        |        |        |        |        |        |        |        |        |        |
| ANGR | 0.1761 | 0.0988 | 0.2842 |        |        |        |        |        |        |        |        |        |        |        |        |        |
| IGRA | 0.3183 | 0.2389 | 0.4053 | 0.1735 |        |        |        |        |        |        |        |        |        |        |        |        |
| SSEB | 0.2866 | 0.2082 | 0.4191 | 0.1710 | 0.1186 |        |        |        |        |        |        |        |        |        |        |        |
| IBEL | 0.4341 | 0.3806 | 0.4261 | 0.3119 | 0.2912 | 0.2144 |        |        |        |        |        |        |        |        |        |        |
| GUAP | 0.3914 | 0.3053 | 0.4394 | 0.2455 | 0.1733 | 0.0975 | 0.2064 |        |        |        |        |        |        |        |        |        |
| ICOM | 0.3129 | 0.2739 | 0.3395 | 0.2152 | 0.1883 | 0.1594 | 0.2254 | 0.0992 |        |        |        |        |        |        |        |        |
| APIA | 0.3826 | 0.3016 | 0.4209 | 0.2389 | 0.1904 | 0.1042 | 0.1802 | 0.0300 | 0.1356 |        |        |        |        |        |        |        |
| GUAR | 0.3787 | 0.3153 | 0.4012 | 0.2914 | 0.2115 | 0.1251 | 0.2069 | 0.0912 | 0.1568 | 0.0445 |        |        |        |        |        |        |
| BLUM | 0.3866 | 0.3101 | 0.4063 | 0.2943 | 0.1854 | 0.1298 | 0.2300 | 0.0551 | 0.1550 | 0.0328 | 0.0204 |        |        |        |        |        |
| SJOS | 0.3928 | 0.3339 | 0.4518 | 0.3108 | 0.2159 | 0.1234 | 0.1959 | 0.0834 | 0.2113 | 0.0468 | 0.0375 | 0.0212 |        |        |        |        |
| PRUD | 0.2772 | 0.2424 | 0.1387 | 0.3213 | 0.4331 | 0.4518 | 0.5061 | 0.4647 | 0.3608 | 0.4803 | 0.4253 | 0.4341 | 0.4854 |        |        |        |
| PUNI | 0.7951 | 0.7547 | 0.8380 | 0.6959 | 0.7074 | 0.6485 | 0.6971 | 0.6693 | 0.7351 | 0.6764 | 0.7051 | 0.6824 | 0.6344 | 0.8281 |        |        |
| FOZI | 0.7863 | 0.7375 | 0.8439 | 0.6896 | 0.6589 | 0.5886 | 0.6663 | 0.6296 | 0.7007 | 0.6154 | 0.6276 | 0.6061 | 0.5685 | 0.8464 | 0.0274 |        |
| TSAM | 0.2649 | 0.2257 | 0.1173 | 0.3242 | 0.3981 | 0.4218 | 0.4545 | 0.4396 | 0.3552 | 0.4504 | 0.4043 | 0.4052 | 0.4466 | 0.0308 | 0.8015 | 0.8169 |

555

Colours highlight  $D_{\text{est}}$  values. Green:  $D_{\text{est}} < 0.05$ ; yellow:  $0.05 < D_{\text{est}} < 0.15$ ; orange:  $0.15 < D_{\text{est}} < 0.25$ ; red:  $D_{\text{est}} > 0.25$ . All  $P < 0.0054$ .

556

557 **Figure legend**

558

559 **Fig. 1** Posterior probability assignment (vertical axis) of individual genotypes (horizontal  
560 axis) for  $K = 10$  (*Tetragonisca angustula*) according to the program BAPS (upper panel).

561 Below, map of the studied area with the approximate location of the sampled populations.

562 Population names are 1: Teresópolis, 2: Resende, 3: Passa Quatro, 4: Angra dos Reis, 5: Ilha

563 Grande, 6: São Sebastião, 7: Ilha de São Sebastião, 8: Iguape, 9: Ilha Comprida, 10: Apiaí, 11:

564 Guaratuba, 12: Blumenau, 13: São José, 14: Prudentópolis, 15: Porto União, 16: Foz do

565 Iguaçú, and 17: Teodoro Sampaio. Detailed location of all islands visited (lower panels).

566 IGRA: Ilha Grande; IANC: Ilha Anchieta; ITMD: Ilha do Tamanduá; IVIT: Ilha da Vitória;

567 IBUZ: Ilha de Búzios; IBEL: Ilha de São Sebastião; IMTG: Ilha Monte de Trigo. ICOM: Ilha

568 Comprida; ICAR: Ilha do Cardoso; IMEL: Ilha do Mel. ISCA: Ilha de Santa Catarina.

69

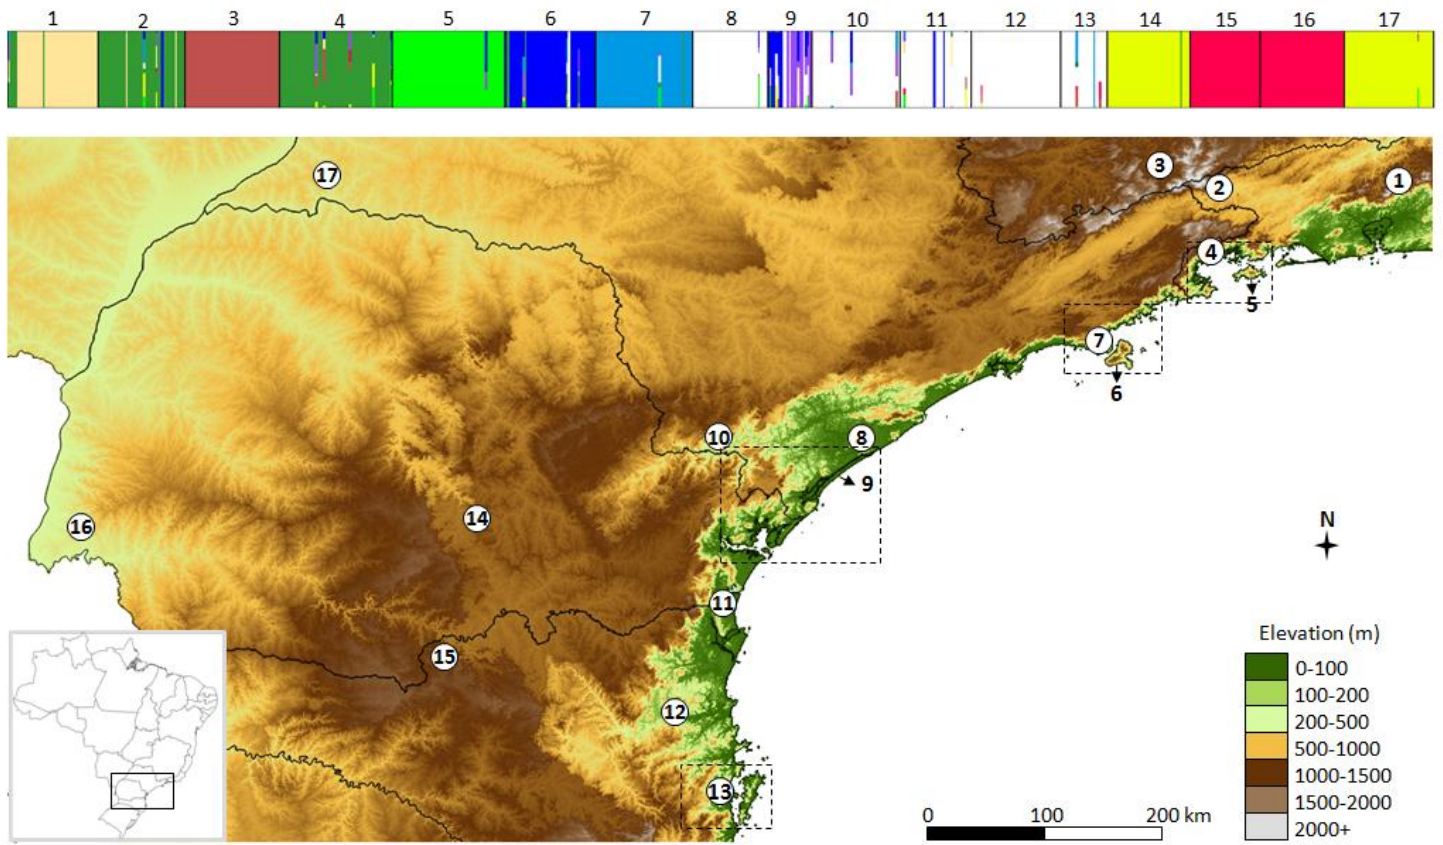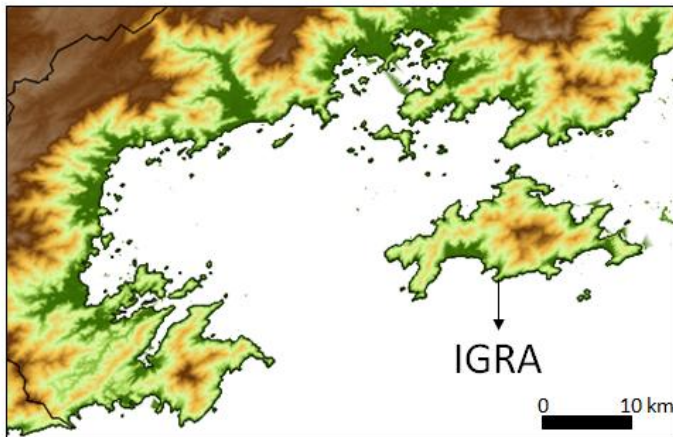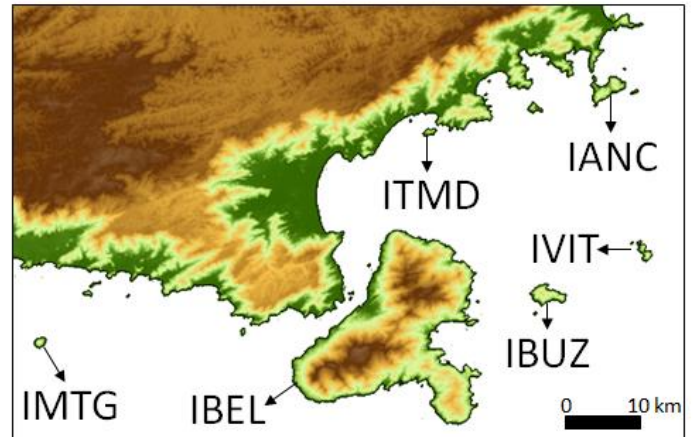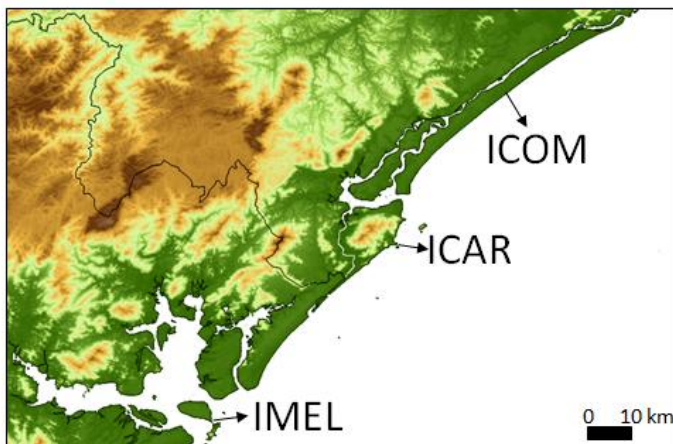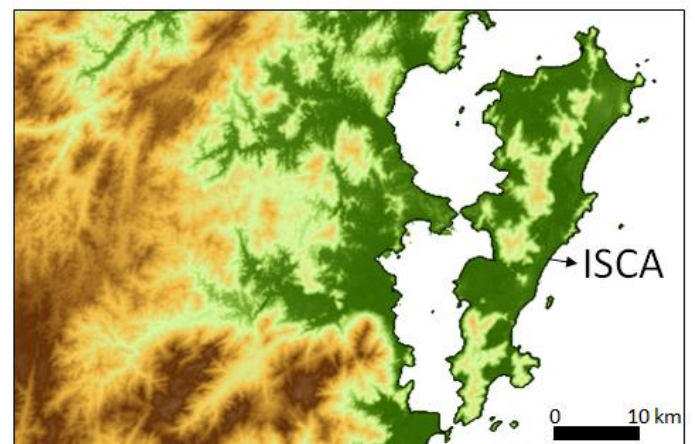

70
